# Supplementary material for: NeuralPMG: A Neural Polyphonic Music Generation System Based on Machine Learning Algorithms
Source: Springer Nature journal article supplement (doi:10.1007/s12559-024-10280-6), 2024-05-15
Supplement: 12559_2024_10280_MOESM1_ESM.pdf [file 12559_2024_10280_MOESM1_ESM.pdf]

## Appendix

Table 1: \*  
Supplementary Table referred to Section 5.4. in the article:

A dataset snippet, relating to a single user (i.e. User1), acquired during training of the mental state classification system. The first 50 items were collected while the user was stimulated to the Focused state by reading sequences of numbers, the next 50 while listening to natural environment sounds to induce the Relaxed state.

| User  | $x_i$     | <i>Delta</i> |       |       |       |       |       |       | <i>Theta</i> |       |       |       |       |       |       | <i>Alpha</i> |       |       |       |       |       |       | <i>Beta</i> |       |       |       |         |      |    | <i>Gamma</i> |     |  |  |  |  |  | Target |
|-------|-----------|--------------|-------|-------|-------|-------|-------|-------|--------------|-------|-------|-------|-------|-------|-------|--------------|-------|-------|-------|-------|-------|-------|-------------|-------|-------|-------|---------|------|----|--------------|-----|--|--|--|--|--|--------|
|       |           | AF3          | T7    | PZ    | T8    | AF4   | AF3   | T7    | PZ           | T8    | AF4   | AF3   | T7    | PZ    | T8    | AF4          | AF3   | T7    | PZ    | T8    | AF4   | AF3   | T7          | PZ    | T8    | AF4   | AF3     | T7   | PZ | T8           | AF4 |  |  |  |  |  |        |
|       | $x_1$     | 1.643        | 0.967 | 0.255 | 0.386 | 0.595 | 0.111 | 1.026 | 0.603        | 1.474 | 0.603 | 0.931 | 0.231 | 0.572 | 1.137 | 1.306        | 0.526 | 1.028 | 0.441 | 0.795 | 1.645 | 1.479 | 1.639       | 1.544 | 1.647 | 1.543 | Focused |      |    |              |     |  |  |  |  |  |        |
|       | $x_2$     | 0.765        | 0.504 | 0.836 | 0.627 | 0.524 | 0.733 | 0.891 | 0.437        | 0.415 | 0.468 | 0.444 | 0.400 | 1.127 | 1.398 | 1.127        | 1.192 | 1.224 | 0.476 | 1.221 | 1.183 | 1.278 | 0.758       | 0.953 | 1.426 | 0.665 | Focused |      |    |              |     |  |  |  |  |  |        |
|       | ....      | ....         | ....  | ....  | ....  | ....  | ....  | ....  | ....         | ....  | ....  | ....  | ....  | ....  | ....  | ....         | ....  | ....  | ....  | ....  | ....  | ....  | ....        | ....  | ....  | ....  | ....    | .... |    |              |     |  |  |  |  |  |        |
| User1 | $x_{50}$  | 1.174        | 1.040 | 0.014 | 1.264 | 1.383 | 1.156 | 0.064 | 0.567        | 1.056 | 1.094 | 0.336 | 0.403 | 1.009 | 0.716 | 0.935        | 0.354 | 0.265 | 1.244 | 1.150 | 1.401 | 0.161 | 0.273       | 0.148 | 0.734 | 0.289 | Focused |      |    |              |     |  |  |  |  |  |        |
|       | $x_{51}$  | 1.343        | 0.148 | 0.066 | 0.835 | 1.158 | 0.467 | 0.268 | 0.508        | 0.315 | 1.359 | 0.943 | 0.152 | 0.586 | 0.081 | 0.751        | 0.647 | 1.496 | 1.217 | 0.728 | 1.341 | 0.206 | 0.585       | 1.391 | 1.376 | 1.070 | Relaxed |      |    |              |     |  |  |  |  |  |        |
|       | $x_{52}$  | 0.927        | 0.514 | 1.404 | 0.187 | 1.095 | 0.969 | 1.249 | 0.597        | 1.124 | 1.252 | 0.483 | 0.828 | 1.468 | 0.824 | 0.495        | 0.929 | 0.541 | 1.134 | 0.620 | 0.738 | 1.042 | 1.459       | 0.491 | 1.256 | 1.108 | Relaxed |      |    |              |     |  |  |  |  |  |        |
|       | ....      | ....         | ....  | ....  | ....  | ....  | ....  | ....  | ....         | ....  | ....  | ....  | ....  | ....  | ....  | ....         | ....  | ....  | ....  | ....  | ....  | ....  | ....        | ....  | ....  | ....  | ....    | .... |    |              |     |  |  |  |  |  |        |
|       | $x_{100}$ | 1.431        | 0.047 | 0.535 | 0.994 | 0.422 | 0.345 | 1.066 | 0.936        | 0.885 | 0.990 | 0.071 | 0.523 | 0.677 | 0.361 | 1.072        | 1.284 | 0.422 | 1.096 | 0.206 | 1.255 | 0.207 | 0.882       | 0.549 | 1.210 | 1.002 | Relaxed |      |    |              |     |  |  |  |  |  |        |
